# Supplementary material for: Epigenetic regulation of AURKA by miR-4715-3p in upper gastrointestinal cancers
Source: PubMed Central journal article supplement (PMC6861278; doi:10.1038/s41598-019-53174-6), 2019-11-18
Supplement: 41598_2019_53174_MOESM1_ESM.pdf [file 41598_2019_53174_MOESM1_ESM.pdf]

# **Epigenetic regulation of AURKA by miR-4715-3p in upper gastrointestinal cancers**

Ahmed Gomaa<sup>1</sup>, Dunfa Peng<sup>1</sup>, Zheng Chen<sup>1, 2</sup>, Mohammed Soutto<sup>1, 2</sup>, Khaled Abouelezz<sup>3</sup>

Alejandro Corvalan<sup>4</sup>, Wael El-Rifai<sup>1, 2</sup>

<sup>1</sup> Department of Surgery, University of Miami, Miami, Florida, USA.

<sup>2</sup> Department of Veterans Affairs, Miami Healthcare System, Miami, Florida, USA.

<sup>3</sup> Department of Medicine, University of Miami, Miami, Florida, USA.

<sup>4</sup> Advanced Center for Chronic Disease, School of Medicine, Pontificia Universidad Catolica de Chile, Portugal, Santiago, Chile

## Supplementary Figure 1

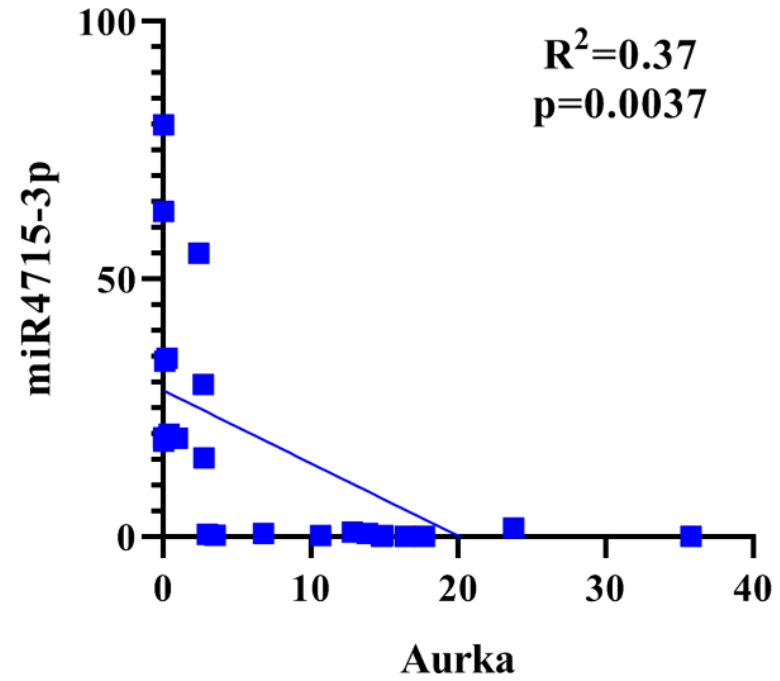

**Supplementary Figure 1. Inverse correlation of expression AUKRA and miR4715-3p.** Normal gastric and tumor human tissues were analyzed for the level of AURKA and miR-47-15-3p using qPCR.

Supplementary Figure 2

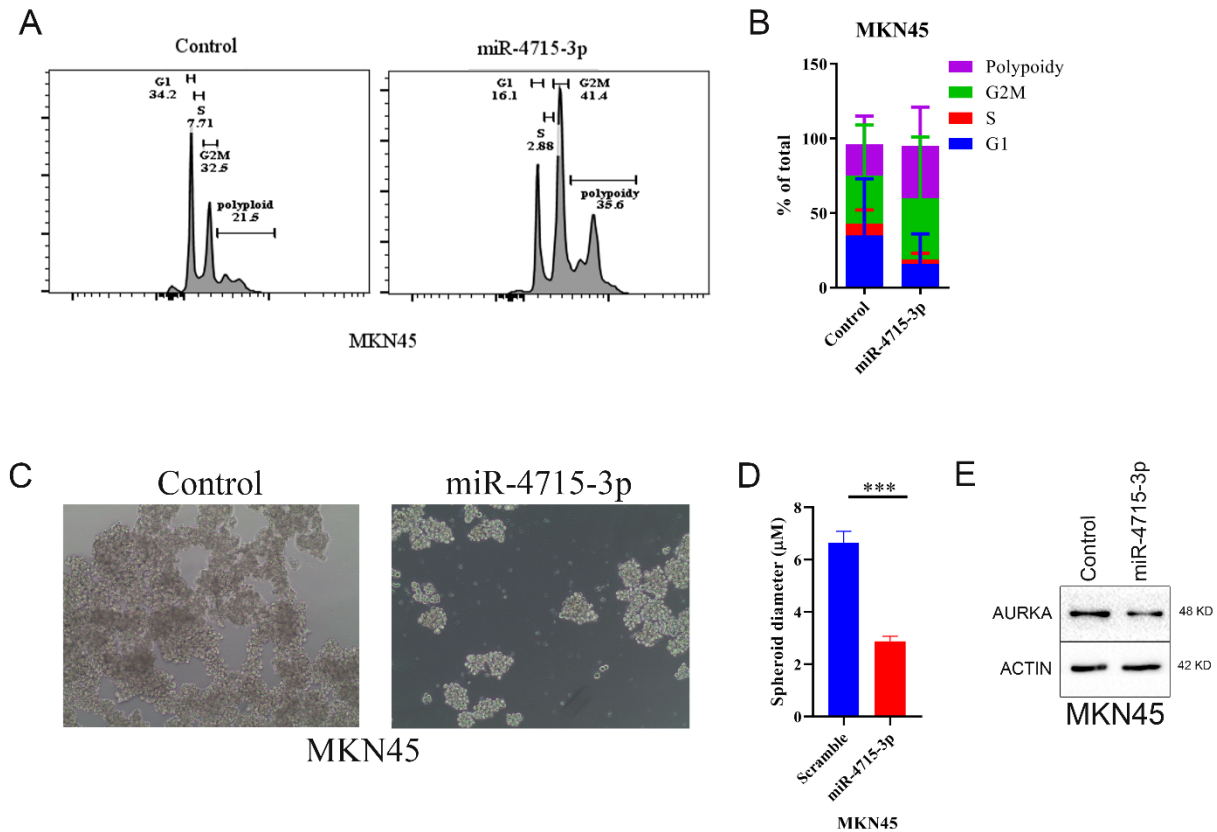

**Supplementary Figure 2. miR-4715-3p suppresses cellular proliferation, and spheroid growth, enhances polyploidy, and alters cell cycle progression. (A & B)** MKN45 cells were transfected with miR-4715-3p mimic 48h, and cell cycle progression was analyzed by flow cytometry. After 48h, miR-4715-3p reconstitution significantly enhanced polyploidy in MKN45 cells. **(C & D)** Reconstitution of miR-4715-3p was established by using lentiviral infection followed by establishing spheroid cultures. **(E)** Western blot analysis of MKN45 spheroids shows significant downregulation of AURKA after miR-4715-3p reconstitution.

Supplementary Figure 3

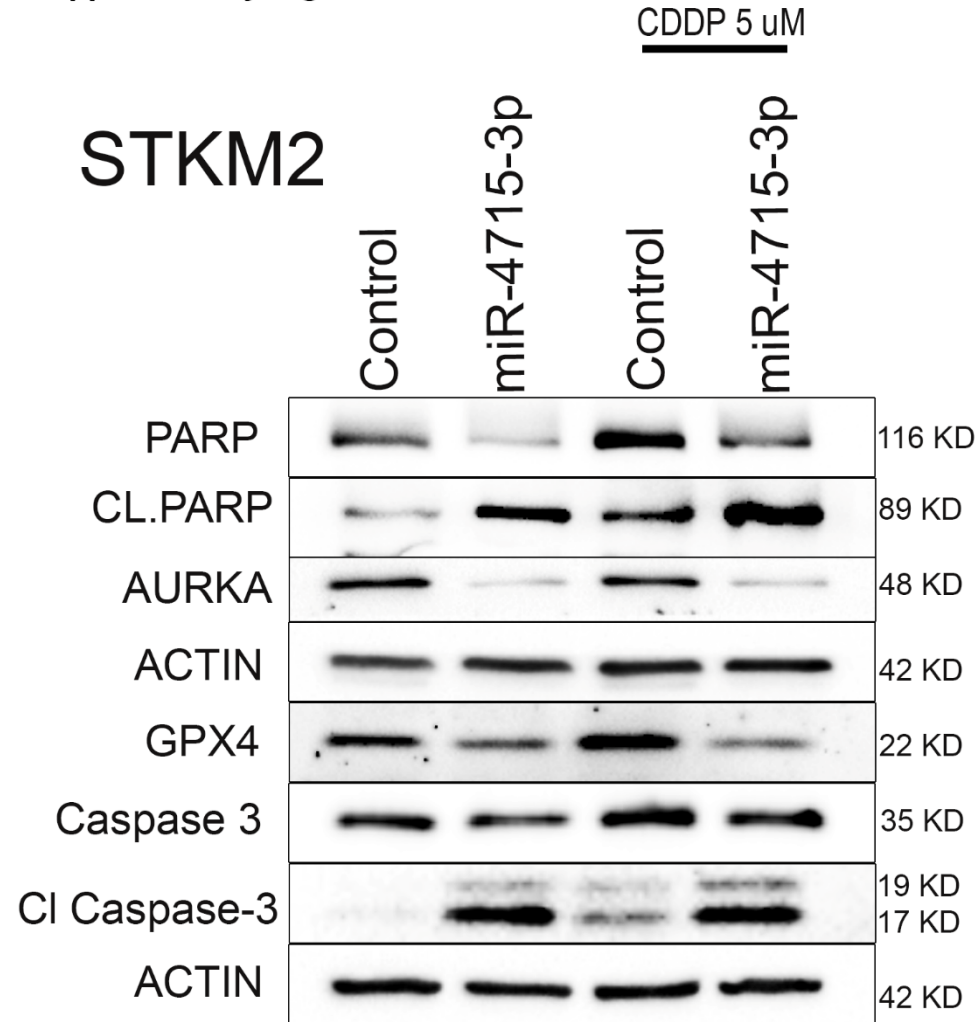

**Supplementary Figure 3. miR-4715-3p overexpression increases gastric cancer cell line, STKM2, death through inhibition of GPX4.** STKM2 cells were transiently transfected with miR-4715-3p. After 48 h, cells were treated with or without Cisplatin 5  $\mu$ M 18h

**Supplementary Figure 4**

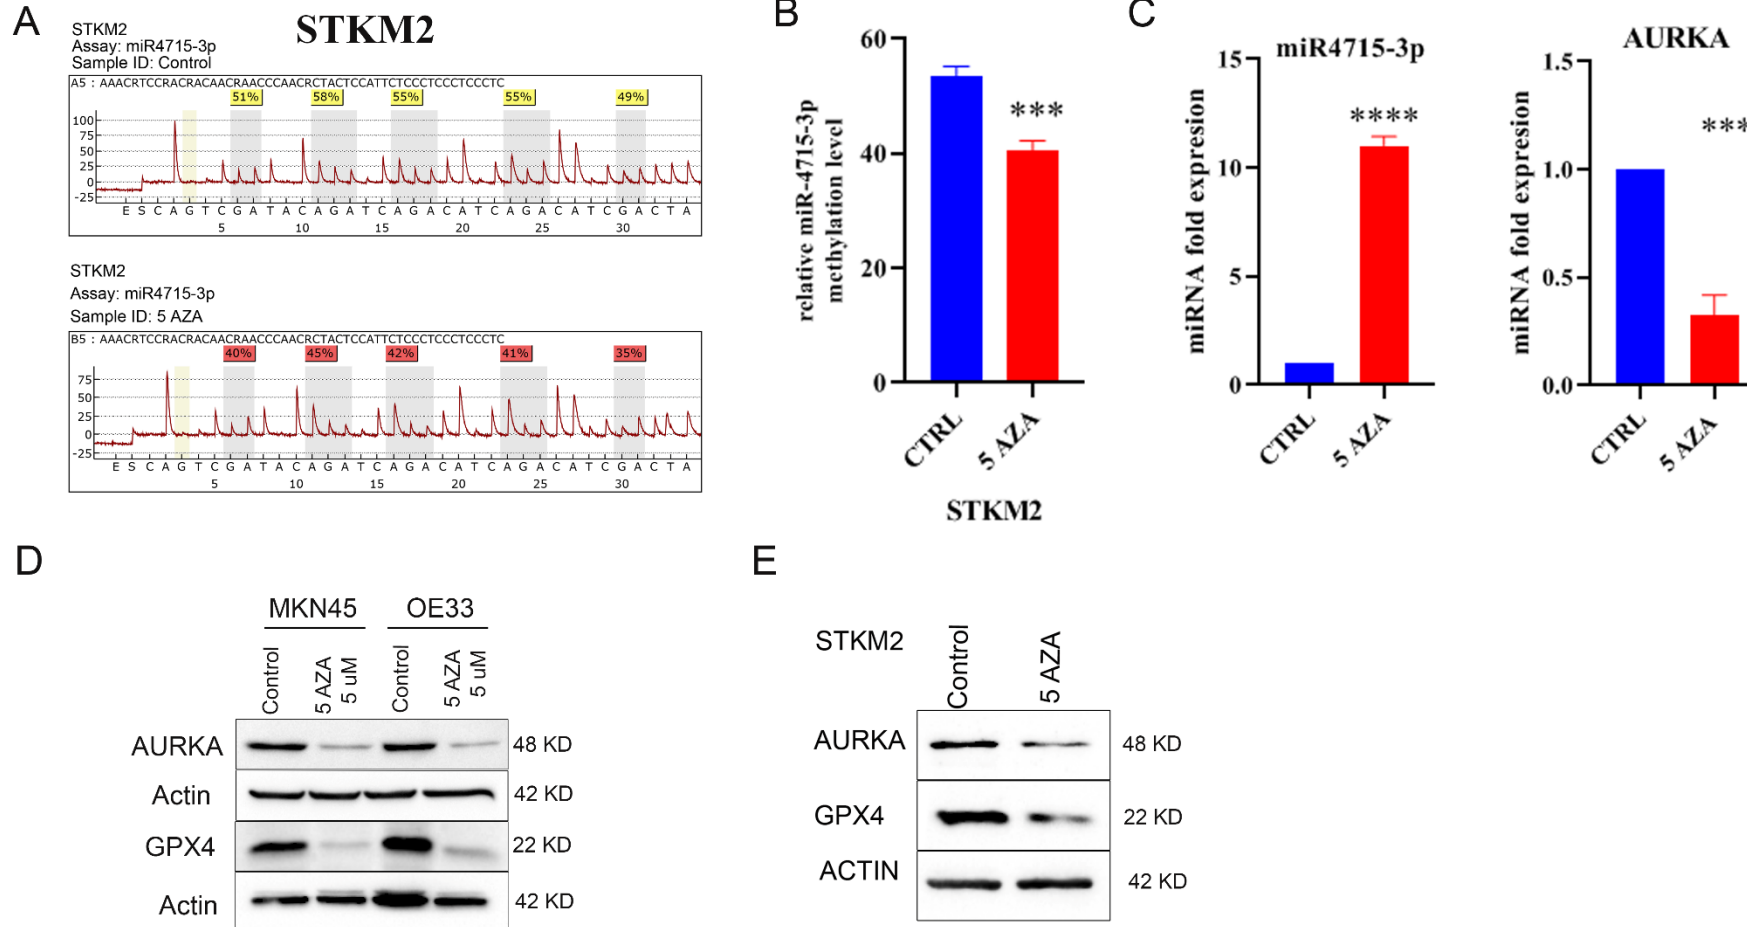

**Supplementary Figure 4. (A, B)** Representative pyrosequencing profiles of STKM2 cells. **(C)** AURKA mRNA and miR-4715-3p expression levels in STKM2 cells treated with 5-Aza-2'-deoxycytidine (Decitabine) 5 $\mu$ M for 72 h. **(D,E)** Western blot analysis of AURKA and GPX4 protein expression levels in OE33, MKN45 and STKM2 cells, following treatment with 5 $\mu$ M of 5-Aza-2'-deoxycytidine (Decitabine) for 72h.

Figure 5 A

OE33

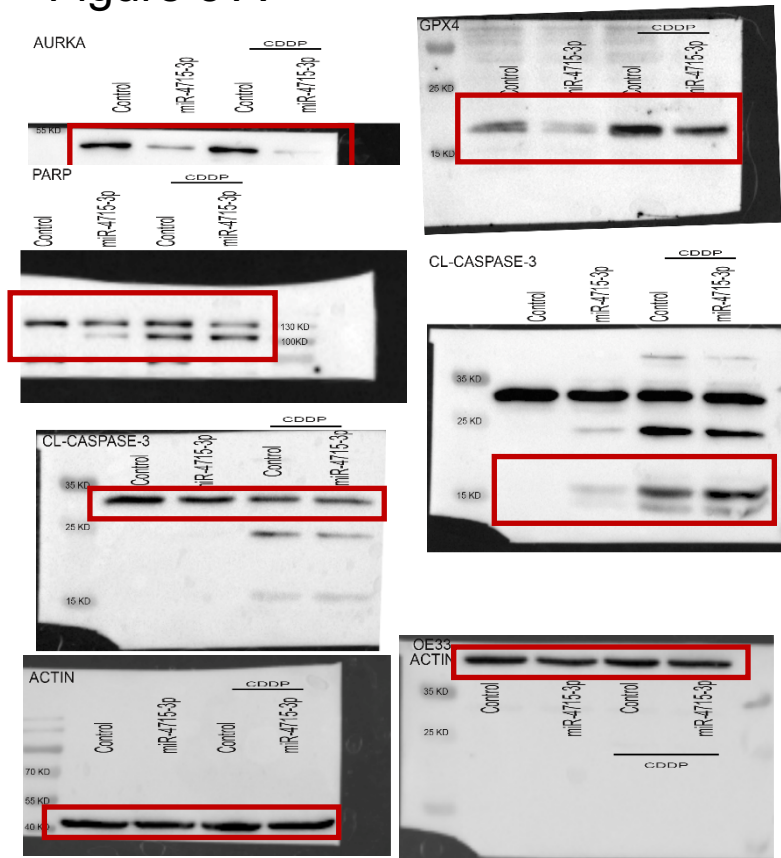

Figure 5 B

MKN45

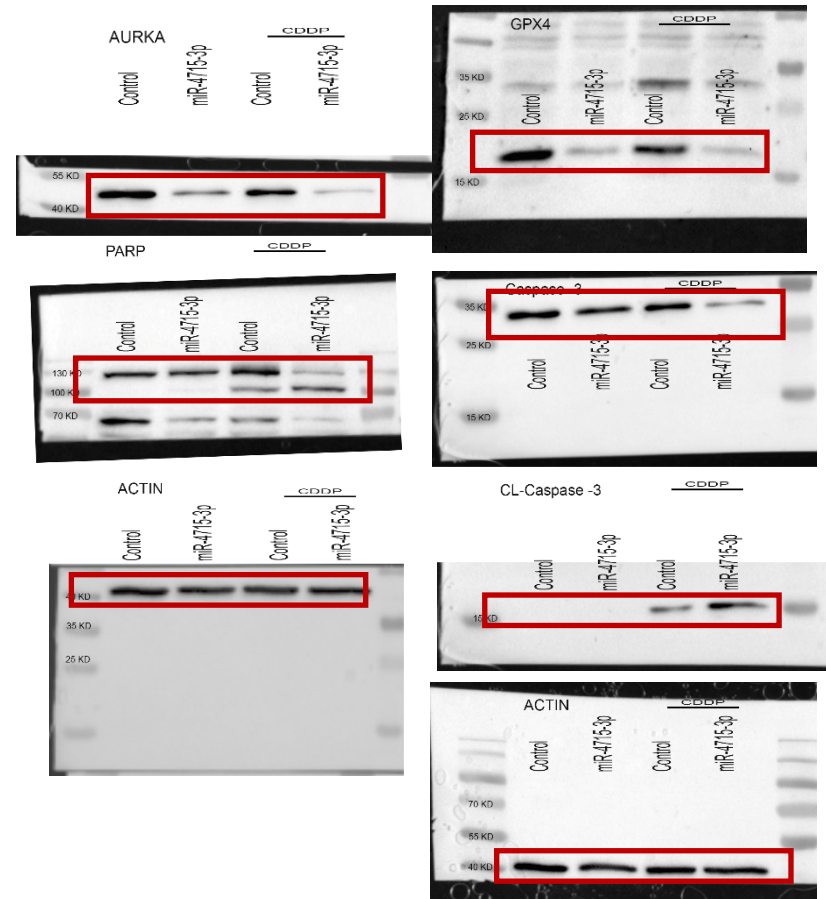

Figure 5 C

OE33

MKN45

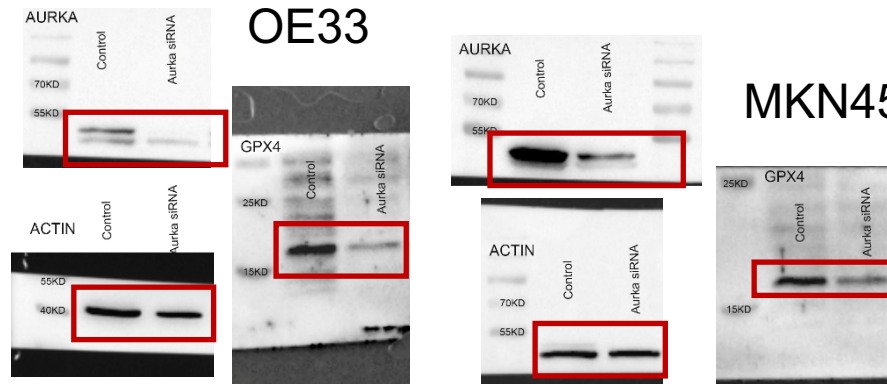

Figure 5 Raw data

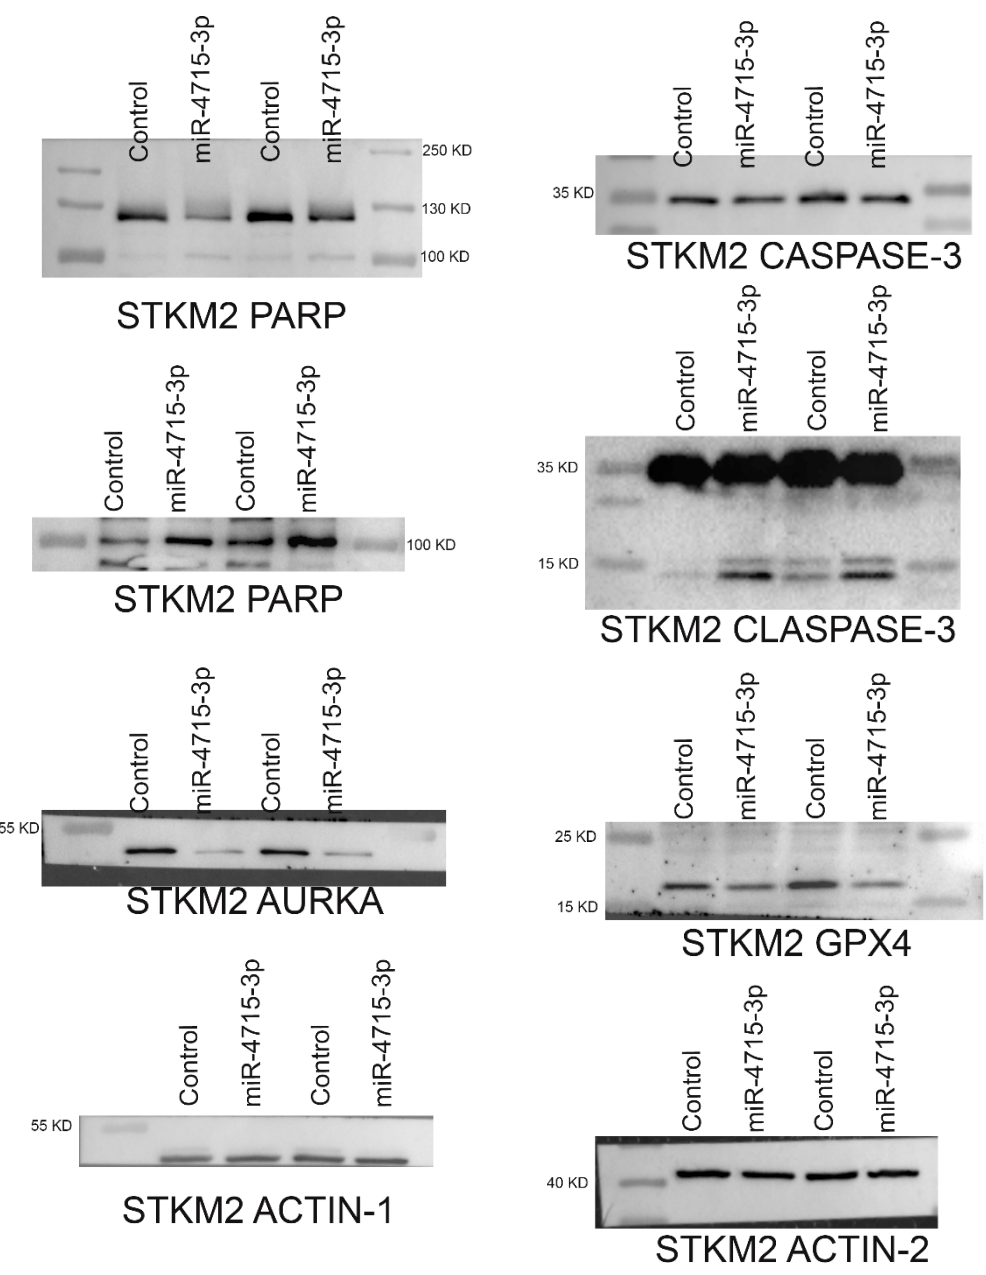

Supplementary Figure 3 Raw data

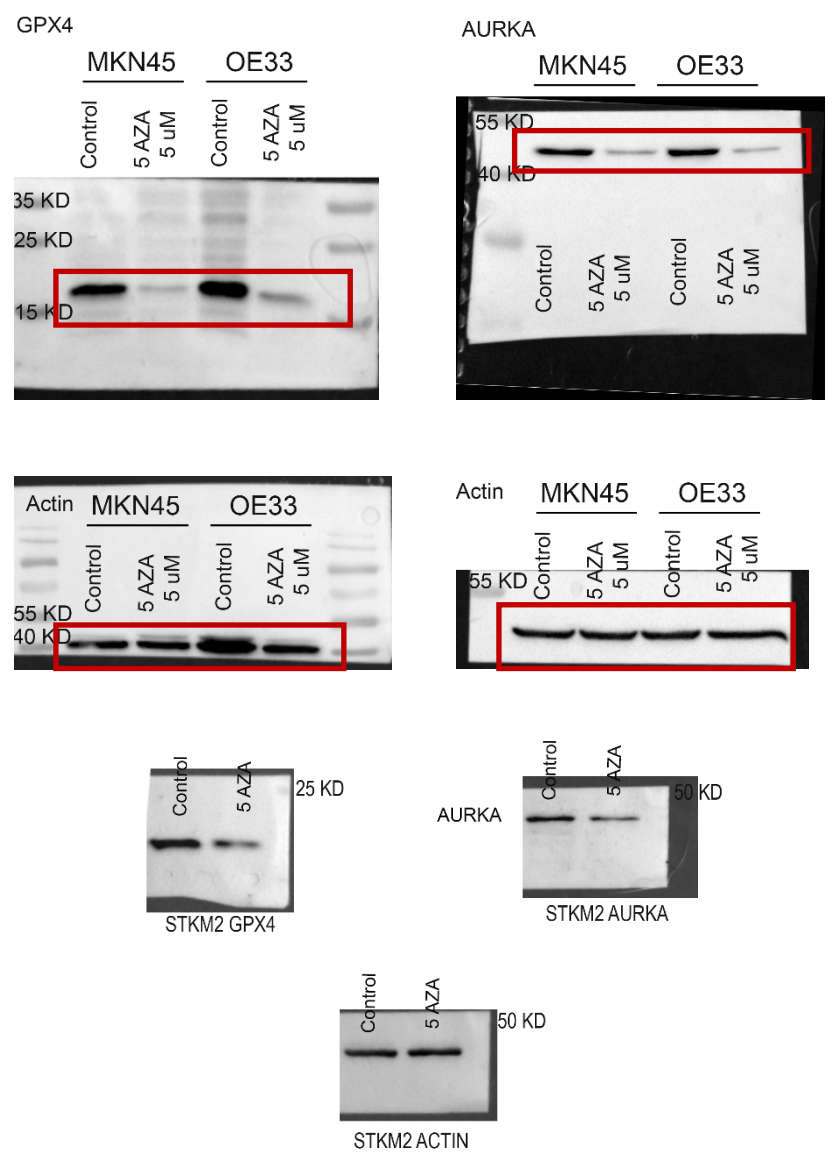

Supplementary Figure 4 Raw data
